# Supplementary material for: Sensitive superoxide dismutase detection via luminol–oxygen electrochemiluminescence enhanced by zero-dimensional carbon catalysts in mesoporous nanochannels
Source: Royal Society of Chemistry journal article supplement (doi:10.1039/d5ra07346d), 2025-01-01
Supplement: d5ra07346d1.pdf [file d5ra07346d1.pdf]

**TABLE**

**Table S1** Detection performance of SOD by different analytical methods.

| Sensing platform                         | Method | Detection pH | Detection range (µg/mL)   | LOD (ng/mL)       | Ref.      |
|------------------------------------------|--------|--------------|---------------------------|-------------------|-----------|
| Mesoporous Pt /AuE                       | ECL    | 7.0          | 0.018-98                  | 11                | 18        |
| MWNT/nano-Au/GCE                         | ECL    | -            | 1.6-162                   | $8.1 \times 10^3$ | 71        |
| PAAD/TiNTs/GCE                           | ECL    | 7.5          | 1.6-16                    | $1.6 \times 10^4$ | 72        |
| [DFIM][Tf <sub>2</sub> N]-HGN/Nafion/GCE | ECL    | -            | 0.36-4.6                  | 140               | 73        |
| DTT/Lucigenin                            | CL     | 11           | $1.0 \times 10^{-2}$ –1.5 | 2.2               | 8         |
| NHPI/Lucigenin                           | CL     | 11           | 0.01-0.25                 | 3.0               | 74        |
| NGQDs@NH <sub>2</sub> -VMSF/ITO          | ECL    | 7.4          | $5.0 \times 10^{-3}$ -5.0 | 0.87              | This work |

Pt: Platinum; AuE: Au electrode; MWNT: multi-wall carbon nanotube; Nano-Au: Au nanoparticles; PAAD: polyamidoamine; TiNTs: titanate nanotubes; [DFIM][Tf<sub>2</sub>N]-: 3-Decyl-1-(ferrocenylmethyl)-imidazolium bis(trifluoromethylsulfonyl) amide salts; HGN: Hydroxy-functionalized graphene; GCE: glassy carbon electrode; DTT: 1,4-Dithiothreitol; Lucigenin: N,N-dimethyl-9,9'-biacridinium dinitrate; NHPI: N-hydroxyphthalimide.

**FIGURE**

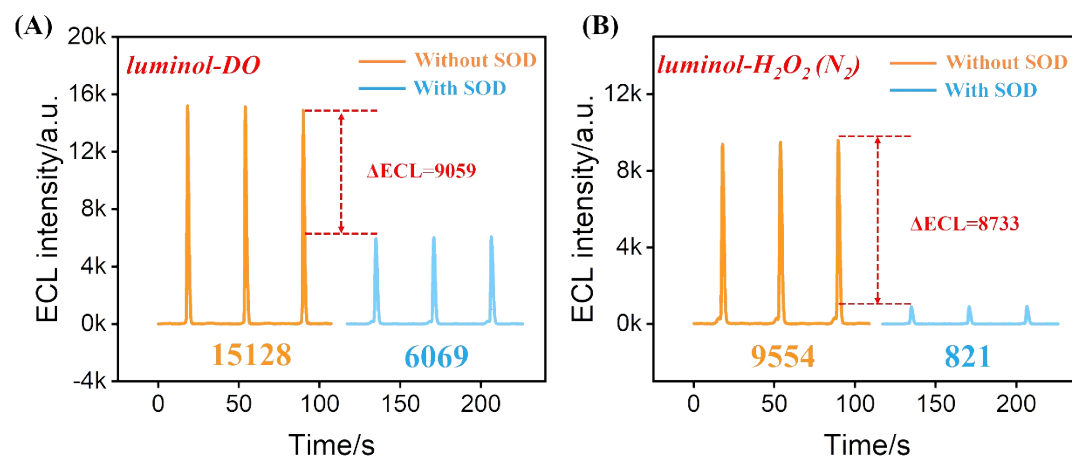

**Figure S1** (A) ECL-time curve obtained on NGQDs@NH<sub>2</sub>-VMSF/ITO electrode in luminol–DO system in absence or presence of SOD (5 µg/mL). The electrolyte in (A) was 100 µM luminol in 0.01 M PBS, pH=7.4. (B) ECL-time curve obtained on NGQDs@NH<sub>2</sub>-VMSF/ITO electrode in luminol-H<sub>2</sub>O<sub>2</sub> system (N<sub>2</sub>-purged) without or with SOD (5 µg/mL). The electrolyte contained 100 µM luminol and 100 µM H<sub>2</sub>O<sub>2</sub> in N<sub>2</sub>-purged PBS (0.01 M, pH=7.4).

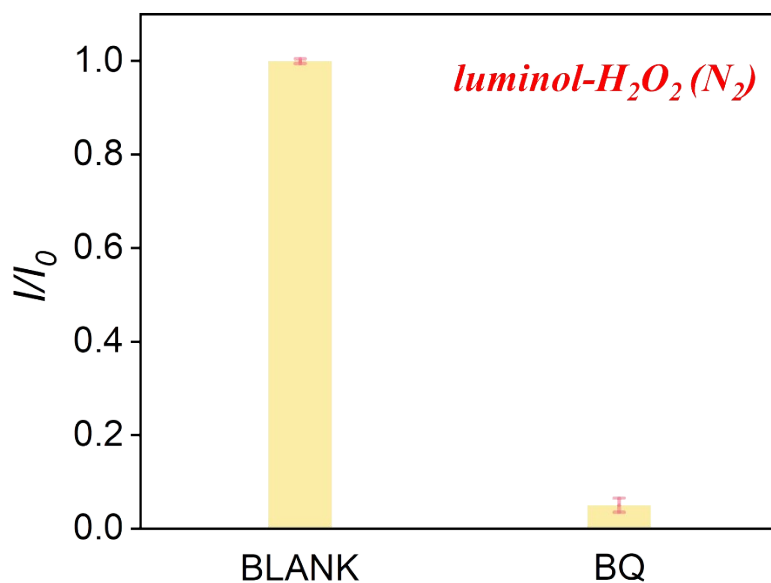

**Figure S2** Changes in ECL intensity of NGQDs@NH<sub>2</sub>-VMSF/ITO electrode in luminol-H<sub>2</sub>O<sub>2</sub> system (N<sub>2</sub>-purged) after the addition of BQ (100 μM). The electrolyte contained 100 μM luminol and 100 μM H<sub>2</sub>O<sub>2</sub> in N<sub>2</sub>-purged PBS (0.01 M, pH=7.4).

**Step 1 : The production of ROS**

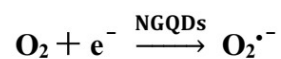

**Step 2 : ECL reaction**

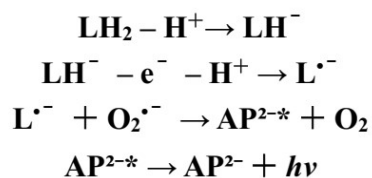

**Step 3 :SOD reaction with O<sub>2</sub><sup>•−</sup>**

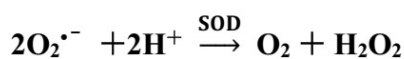

**Figure S3** Mechanism of ECL process and SOD-based quenching.
